# Supplementary material for: Fall risk in an active elderly population – can it be assessed?
Source: Springer Nature journal article supplement (doi:10.1186/1477-5751-6-2), 2007-01-26
Supplement: 12952_2006_46_MOESM5_ESM.pdf [file 12952_2006_46_MOESM5_ESM.pdf]

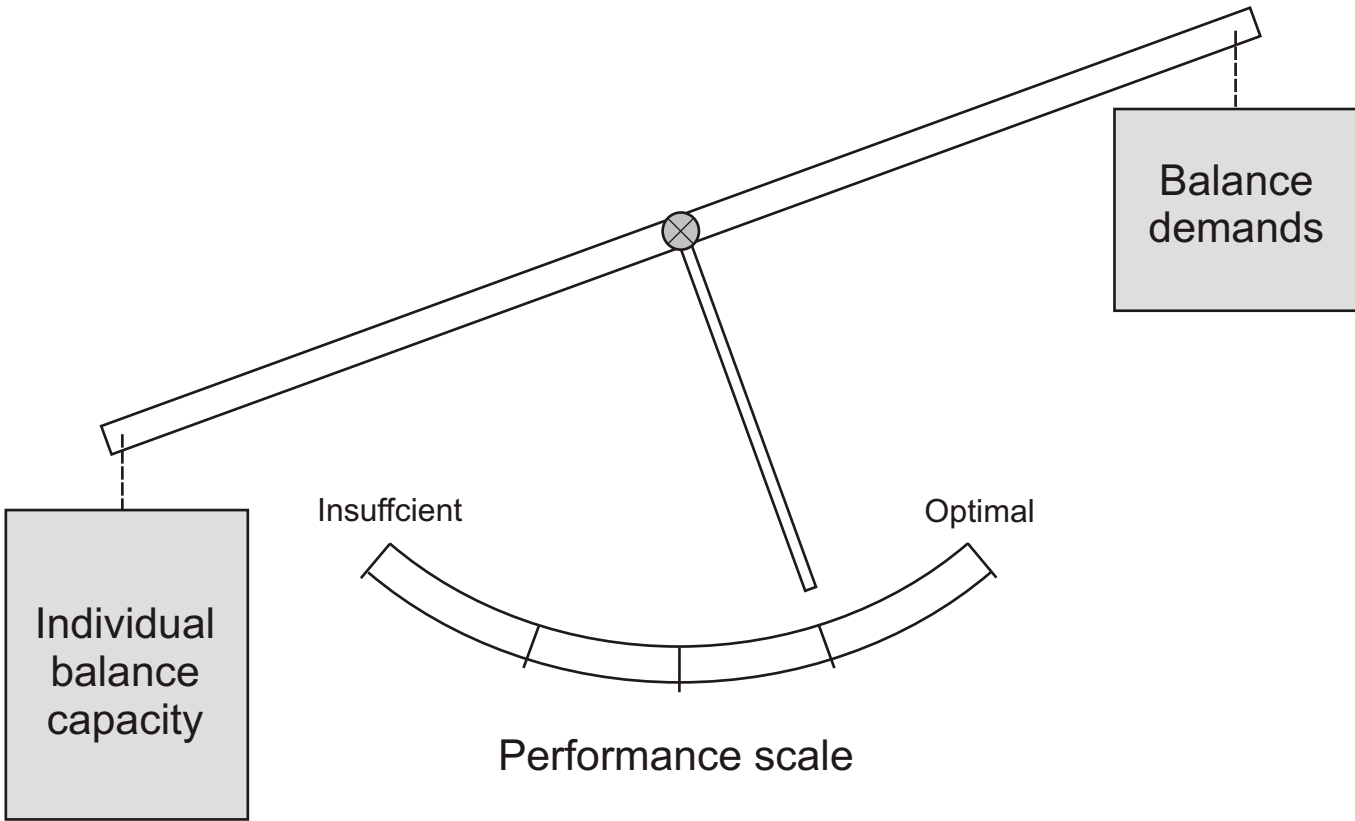

Individual  
balance  
capacity

Balance  
demands

Insufficient

Optimal

Performance scale
